# Supplementary material
Source: Springer Nature journal article supplement (https://www.springermedizin.de/resource/supplementary/13256_2007_156_MOESM2_ESM.pdf/9645392)

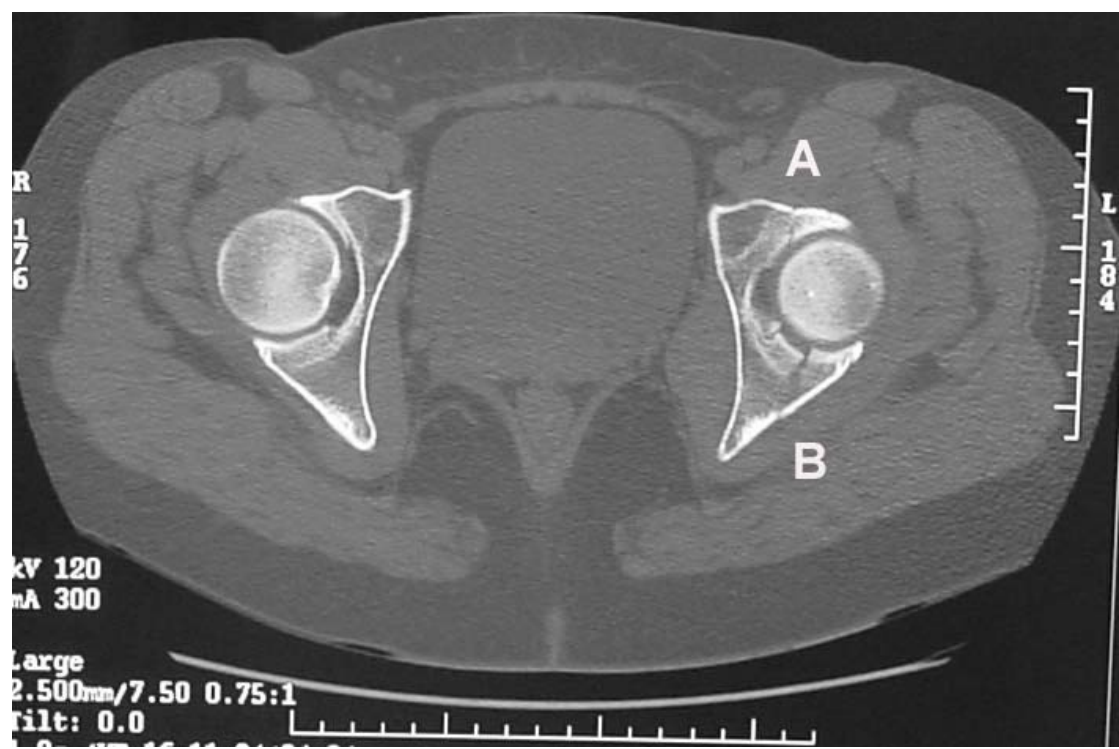

Supplement: MOESM2 [file 9645392]
